# Supplementary material for: Genome-wide Association Study of Axial Length in Population-based Cohorts in Japan: The Tohoku Medical Megabank Organization Eye Study
Source: PubMed Central journal article supplement — Ophthalmol Sci. 2022 Jan 22;2(1):100113. doi: 10.1016/j.xops.2022.100113 (PMC9559092; doi:10.1016/j.xops.2022.100113), 2022-01-22
Supplement: mmc1.pdf [file mmc1.pdf]

### Supplementary Table. Assessment of the effect of top hit loci between this study and a previous European study

| Chr | Gene                       | Lead SNP      | Discovery Stage in ToMMo |       |         | Validation Stage in ToMMo |       |         | UKBB-1** |       |          | GERA** |       |         |
|-----|----------------------------|---------------|--------------------------|-------|---------|---------------------------|-------|---------|----------|-------|----------|--------|-------|---------|
|     |                            |               | B                        | SE    | P       | B                         | SE    | P       | B        | SE    | P        | B      | SE    | P       |
| 15  | <i>LINC02252~GJD2</i>      | rs16959560*   | 0.084                    | 0.009 | 2.3E-21 | 0.091                     | 0.013 | 3.5E-13 | NA       | NA    | NA       | NA     | NA    | NA      |
|     |                            | rs524952      | 0.083                    | 0.009 | 4.1E-21 | 0.091                     | 0.013 | 3.5E-13 | 0.251    | 0.011 | 5.2E-116 | 0.206  | 0.019 | 4.5E-28 |
| 22  | <i>WNT7B</i>               | rs368756970*  | -0.086                   | 0.009 | 5.0E-20 | -0.092                    | 0.013 | 6.3E-12 | NA       | NA    | NA       | NA     | NA    | NA      |
|     |                            | rs533628434   | NA                       | NA    | NA      | NA                        | NA    | NA      | 0.101    | 0.012 | 4.5E-18  | NA     | NA    | NA      |
| 17  | <i>ANKFN1~NOG</i>          | rs151278468*  | -0.397                   | 0.044 | 1.7E-20 | -0.378                    | 0.060 | 5.0E-10 | NA       | NA    | NA       | NA     | NA    | NA      |
|     |                            | rs12603264    | 0.042                    | 0.010 | 1.7E-05 | NA                        | NA    | NA      | 0.119    | 0.012 | 2.9E-23  | 0.083  | 0.019 | 1.9E-05 |
| 7   | <i>VIPR2</i>               | rs141313179*  | 0.364                    | 0.040 | 2.5E-20 | 0.303                     | 0.057 | 2.1E-07 | NA       | NA    | NA       | NA     | NA    | NA      |
|     |                            | rs12234576    | -0.046                   | 0.010 | 9.4E-06 | NA                        | NA    | NA      | -0.117   | 0.015 | 3.1E-16  | -0.077 | 0.026 | 2.9E-03 |
| 1   | <i>LYPLAL1-AS1~ZC3H11B</i> | NA:219743871* | 0.060                    | 0.009 | 5.8E-12 | 0.082                     | 0.013 | 1.3E-10 | NA       | NA    | NA       | NA     | NA    | NA      |
| 15  | <i>RASGRF1</i>             | rs755362*     | 0.060                    | 0.009 | 2.2E-12 | 0.079                     | 0.013 | 7.2E-10 | NA       | NA    | NA       | NA     | NA    | NA      |
|     |                            | rs1007365     | 0.059                    | 0.009 | 5.2E-12 | 0.083                     | 0.013 | 7.3E-11 | 0.154    | 0.011 | 3.1E-42  | 0.133  | 0.019 | 2.2E-12 |
| 11  | <i>LRRC4C</i>              | rs7936359*    | 0.078                    | 0.011 | 1.4E-13 | 0.091                     | 0.016 | 1.0E-08 | NA       | NA    | NA       | NA     | NA    | NA      |
|     |                            | rs11602008    | 0.077                    | 0.011 | 1.6E-13 | 0.088                     | 0.016 | 3.1E-08 | 0.232    | 0.015 | 2.5E-56  | 0.179  | 0.025 | 1.3E-12 |
| 2   | <i>PRSS56</i>              | rs77311538*   | -0.103                   | 0.015 | 1.3E-11 | -0.129                    | 0.023 | 1.8E-08 | NA       | NA    | NA       | NA     | NA    | NA      |
|     |                            | rs1550094     | NA                       | NA    | NA      | NA                        | NA    | NA      | -0.205   | 0.012 | 2.6E-67  | NA     | NA    | NA      |

Chr: chromosome; NA: not applicable.

\* Lead SNP in our meta-analysis.

\*\*Results of the meta-analyses of GWAS from the four discovery cohorts from Hysi, et al. Nat Genet 2020.

UKBB: The UK Biobank, GERA: The Genetic Epidemiology Research in Adult Health and Aging cohort.
