# Supplementary material for: Genome-wide Association Study of Axial Length in Population-based Cohorts in Japan: The Tohoku Medical Megabank Organization Eye Study
Source: PubMed Central journal article supplement — Ophthalmol Sci. 2022 Jan 22;2(1):100113. doi: 10.1016/j.xops.2022.100113 (PMC9559092; doi:10.1016/j.xops.2022.100113), 2022-01-22

# Supplementary Figure 1. Distribution of Axial Length by Educational Background

**Discovery Stage N=22,379 (male: 6,791; female: 15,588)**

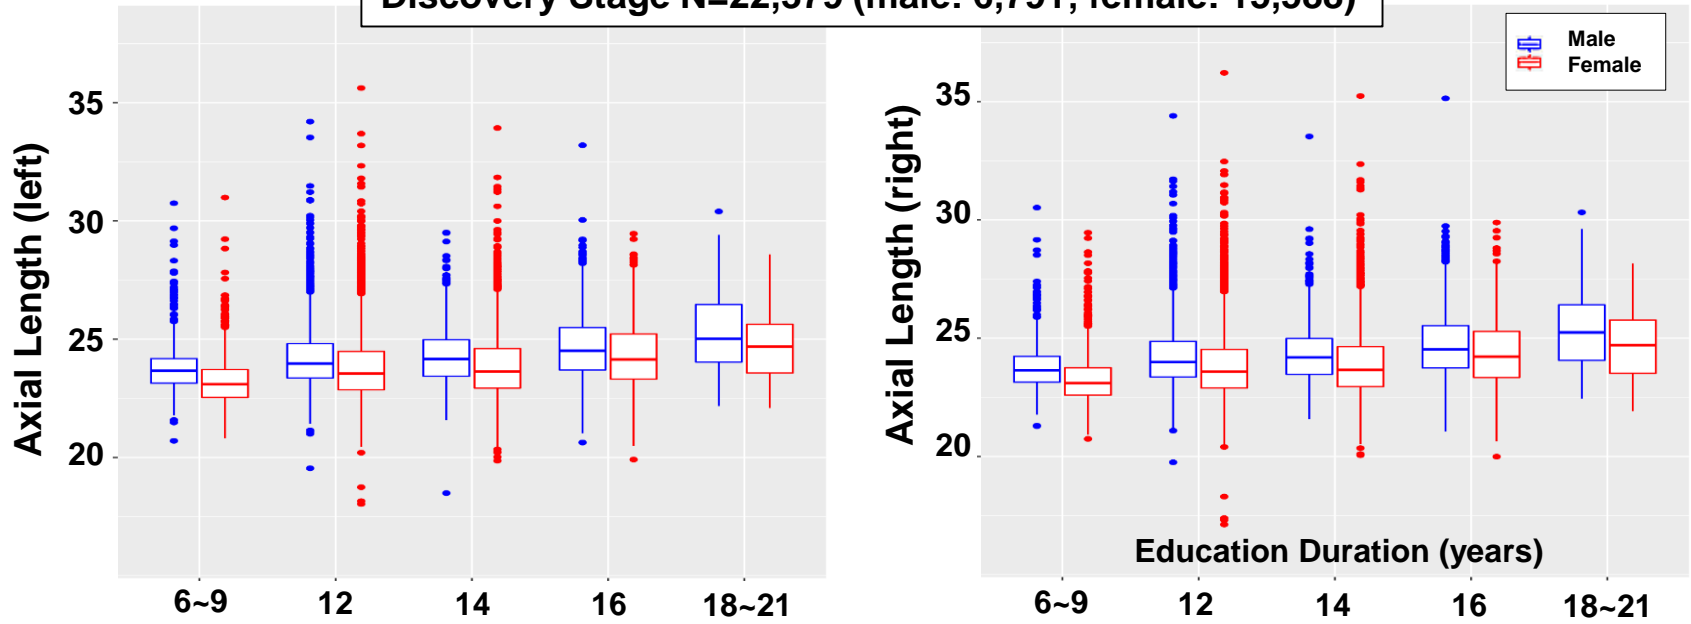

**Validation Stage N=11,104 (male: 3,994; female: 7,110)**

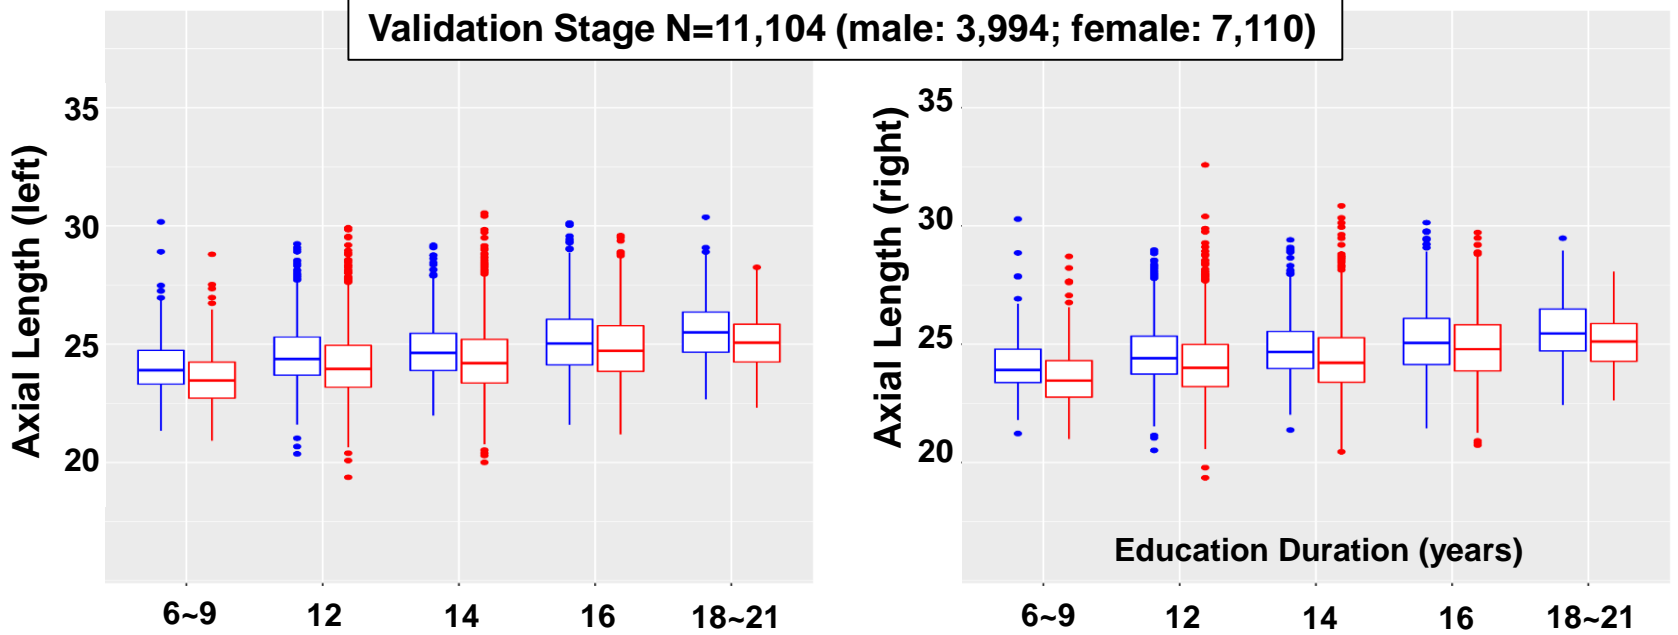

Supplement: mmc2.pdf [file mmc2.pdf]
