# Supplementary material for: Genome-wide Association Study of Axial Length in Population-based Cohorts in Japan: The Tohoku Medical Megabank Organization Eye Study
Source: PubMed Central journal article supplement — Ophthalmol Sci. 2022 Jan 22;2(1):100113. doi: 10.1016/j.xops.2022.100113 (PMC9559092; doi:10.1016/j.xops.2022.100113), 2022-01-22

# Supplementary Figure 2. Quantile-Quantile Plot of GWAS Result Inflation Factor

## Community-Based Cohort (Discovery Stage)

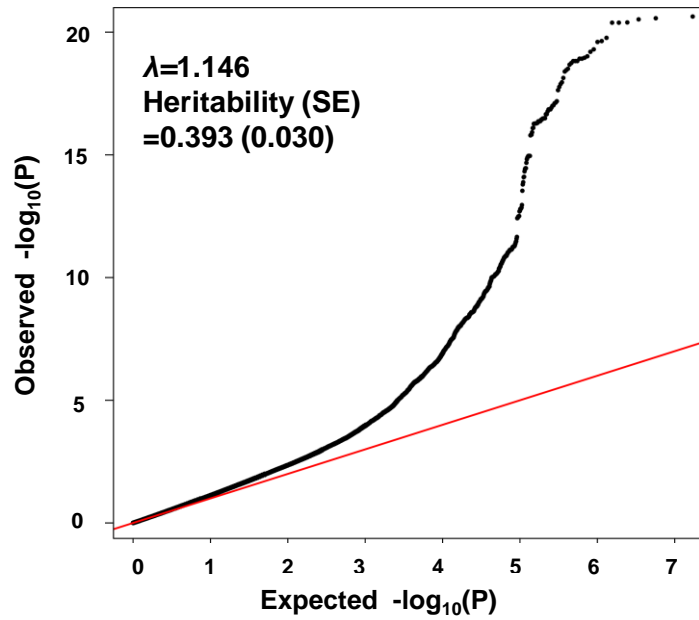

## Birth and Three-Generation Cohort (Validation Stage)

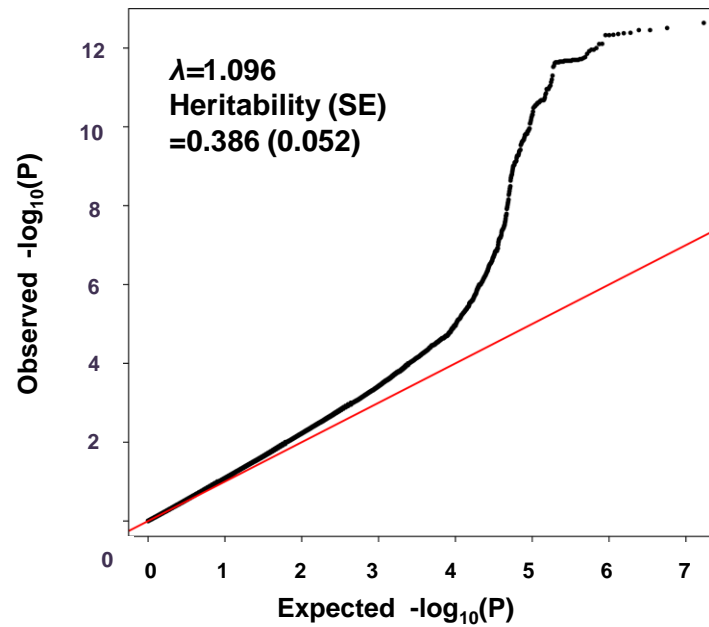

## Meta-analysis (Discovery Stage + Validation Stage)

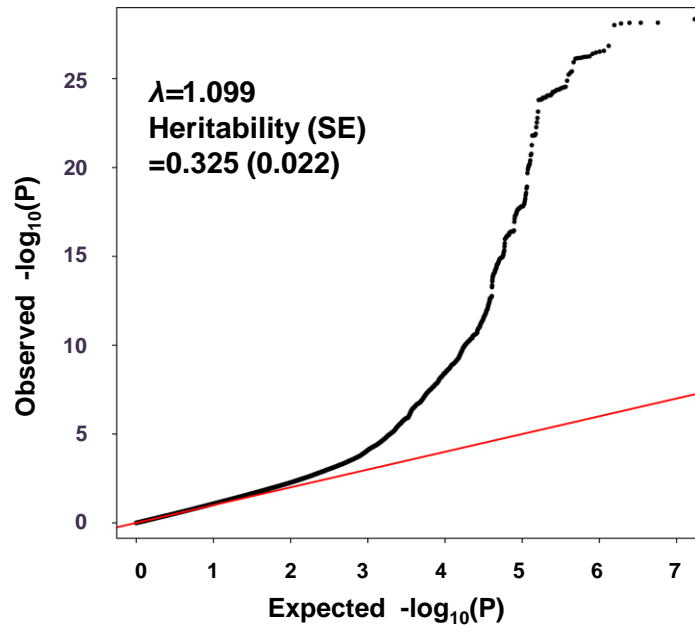

Supplement: mmc3.pdf [file mmc3.pdf]
