# Supplementary material for: Genome-wide Association Study of Axial Length in Population-based Cohorts in Japan: The Tohoku Medical Megabank Organization Eye Study
Source: PubMed Central journal article supplement — Ophthalmol Sci. 2022 Jan 22;2(1):100113. doi: 10.1016/j.xops.2022.100113 (PMC9559092; doi:10.1016/j.xops.2022.100113), 2022-01-22

**A** Chr15\_rs16959560\_LINC02252~GJD2

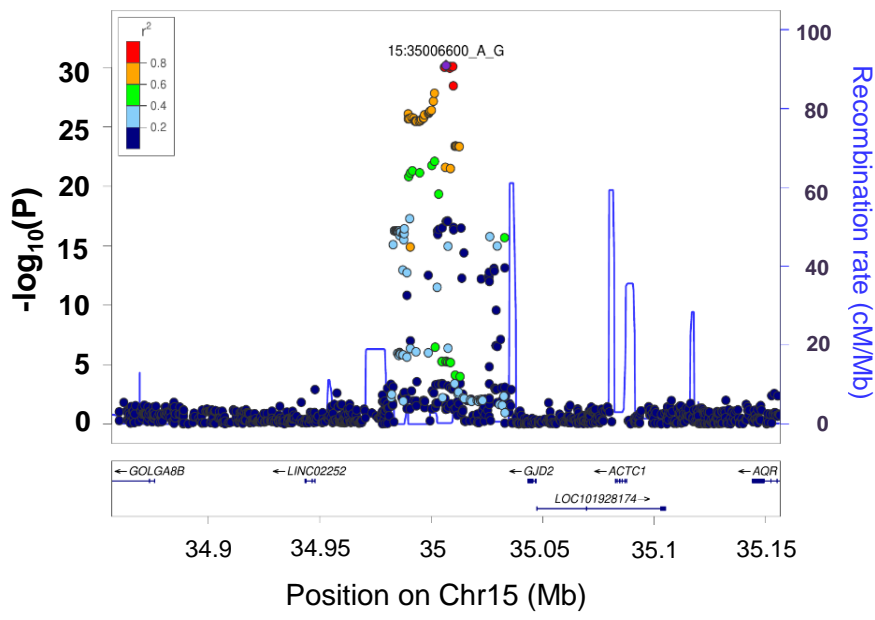

**B** Chr22\_rs10453459\_WNT7B

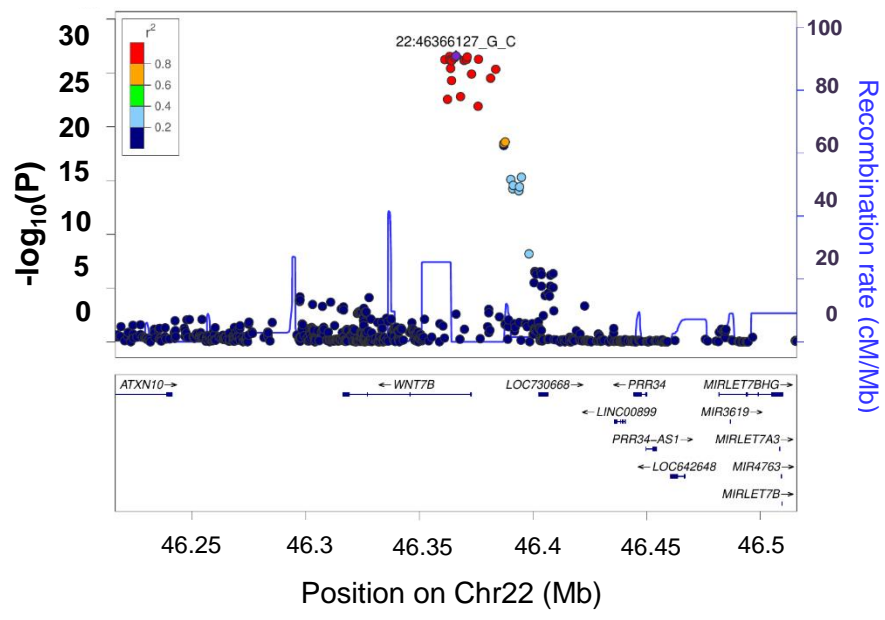

**C** Chr17\_rs151278468\_ANKFN1~NOG

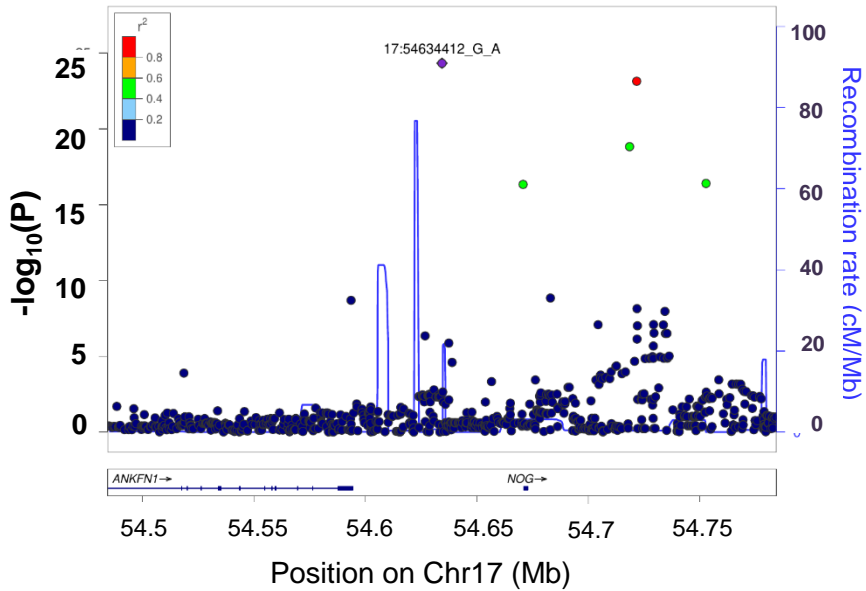

**D** Chr7\_rs141313179\_VIPR2

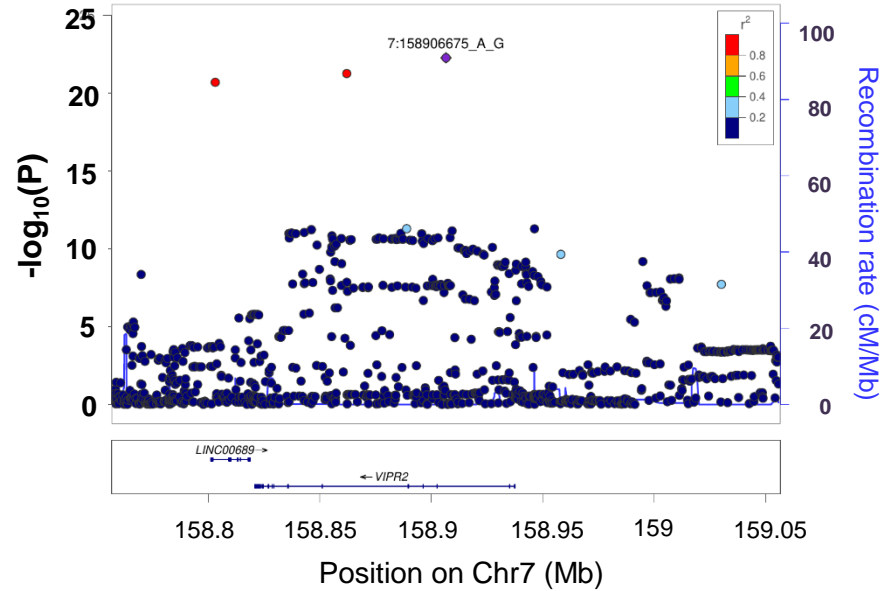

**E Chr1\_1:219743871\_AT\_ATTT  
\_LYPLAL1-AS1~ZC3H11B**

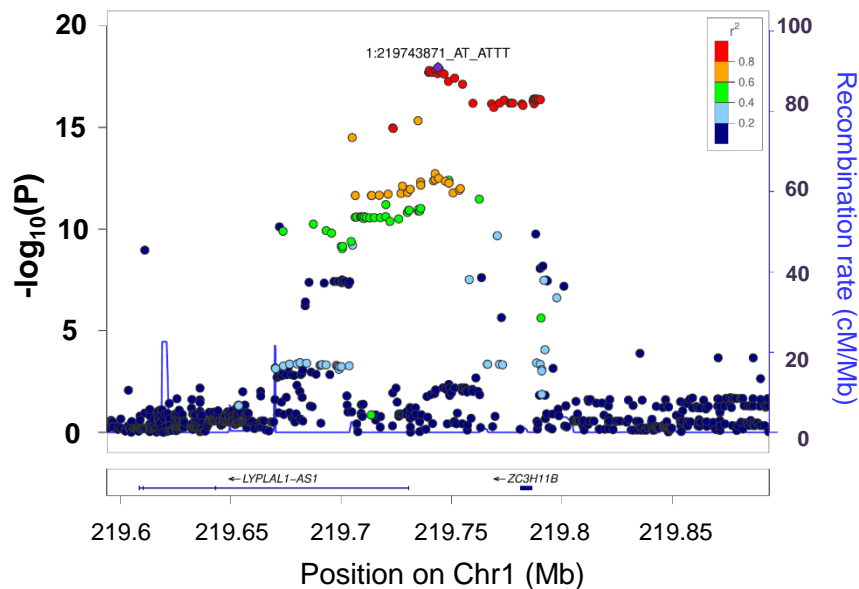

**F Chr15\_rs13380109\_RASGRF1**

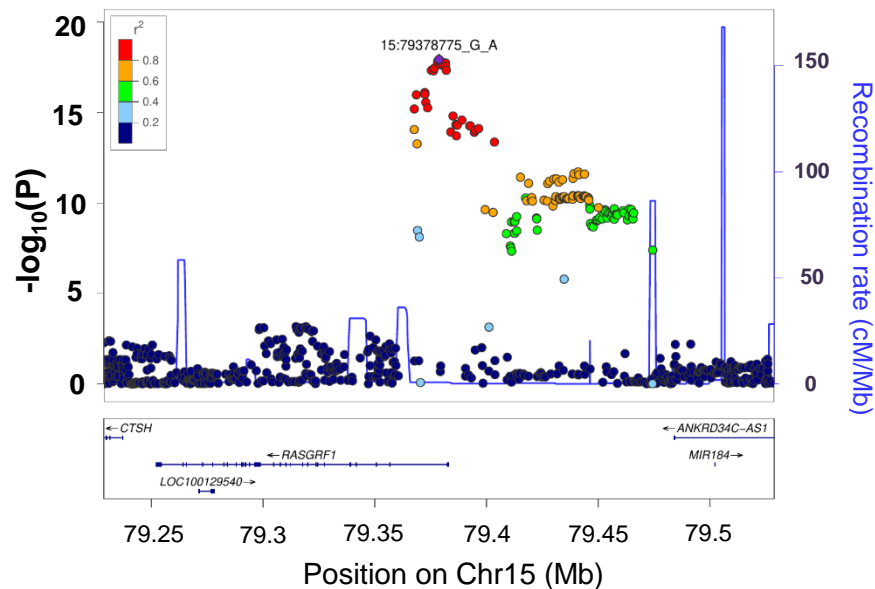

**G Chr11\_rs7936359\_LRRC4C**

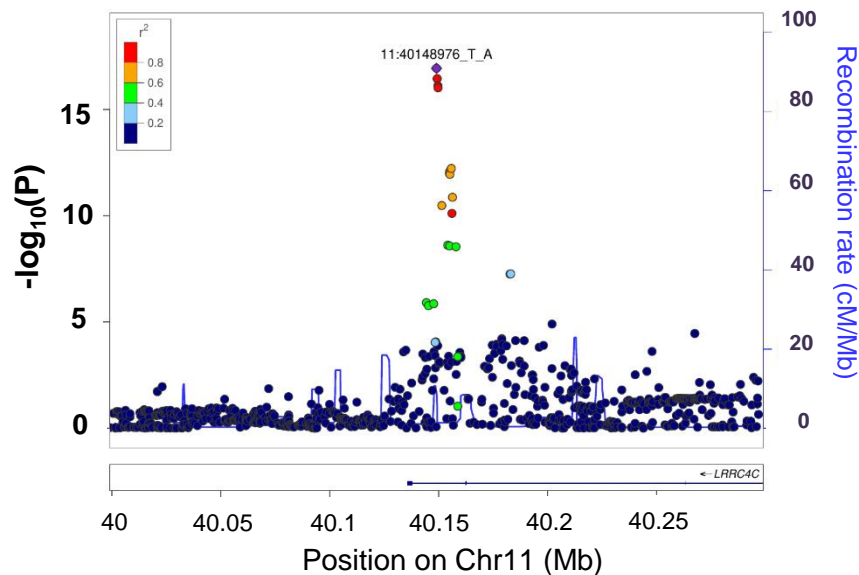

**H Chr2\_rs77311538\_PRSS56**

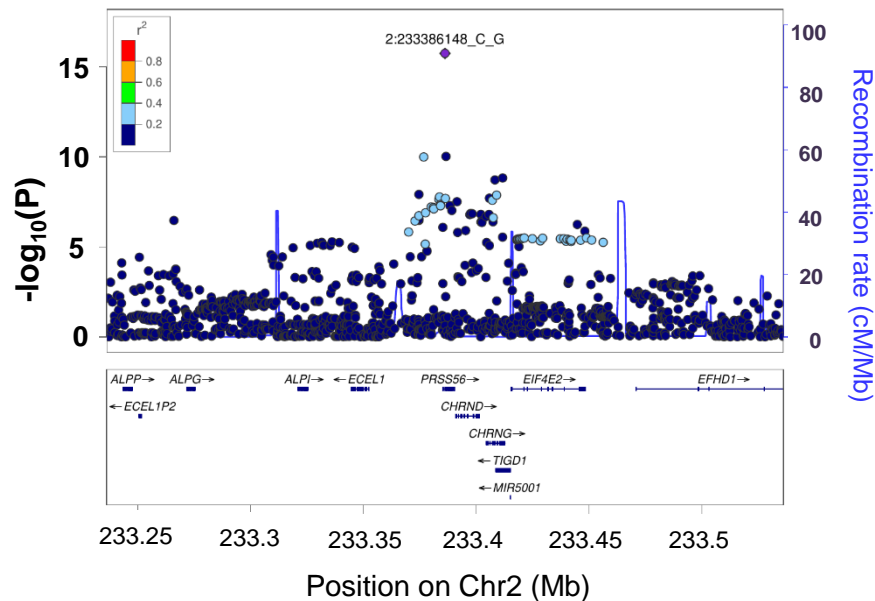

Supplement: mmc4.pdf [file mmc4.pdf]
